# Supplementary material for: In Vivo Validation of Alternative FDXR Transcripts in Human Blood in Response to Ionizing Radiation
Source: PubMed Central journal article supplement (PMC7660203; doi:10.3390/ijms21217851), 2020-10-23
Supplement: ijms-21-07851-s001.pdf [file ijms-21-07851-s001.pdf]

## Supplementary Material

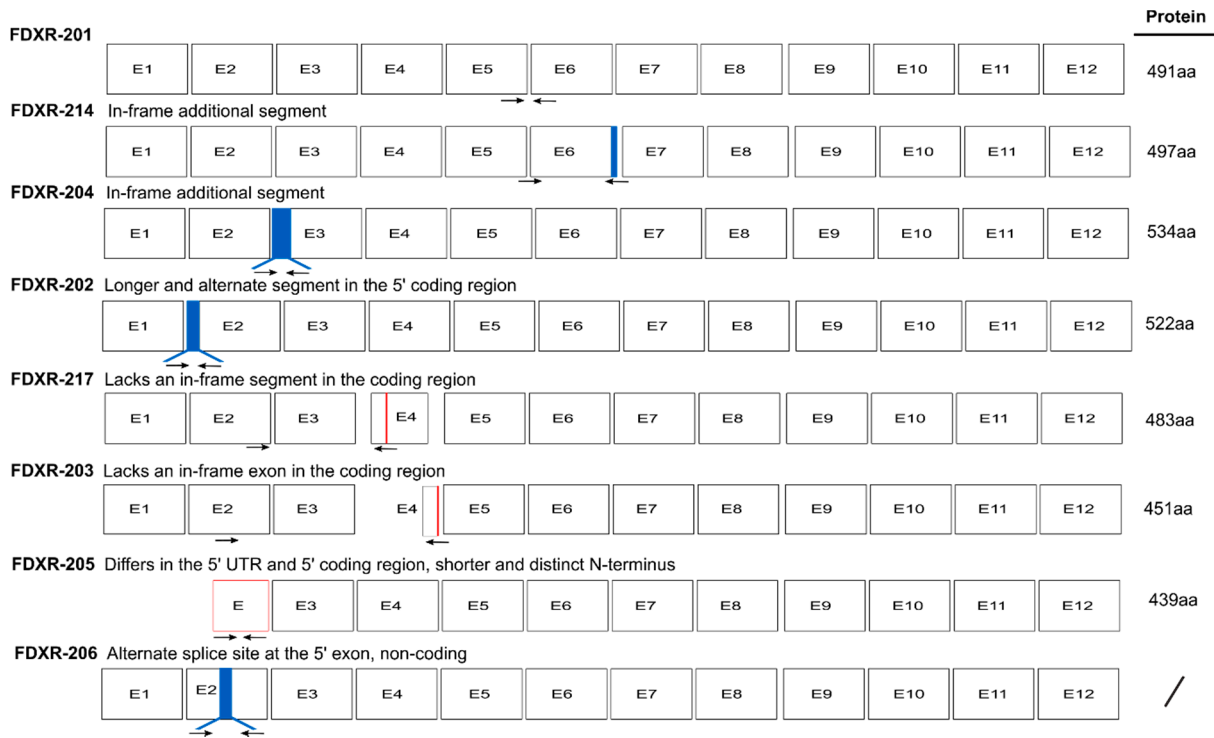

**Figure S1.** Position of the qPCR primers in the different FDXR variants. Primers sequences are described in supplementary Table 2.

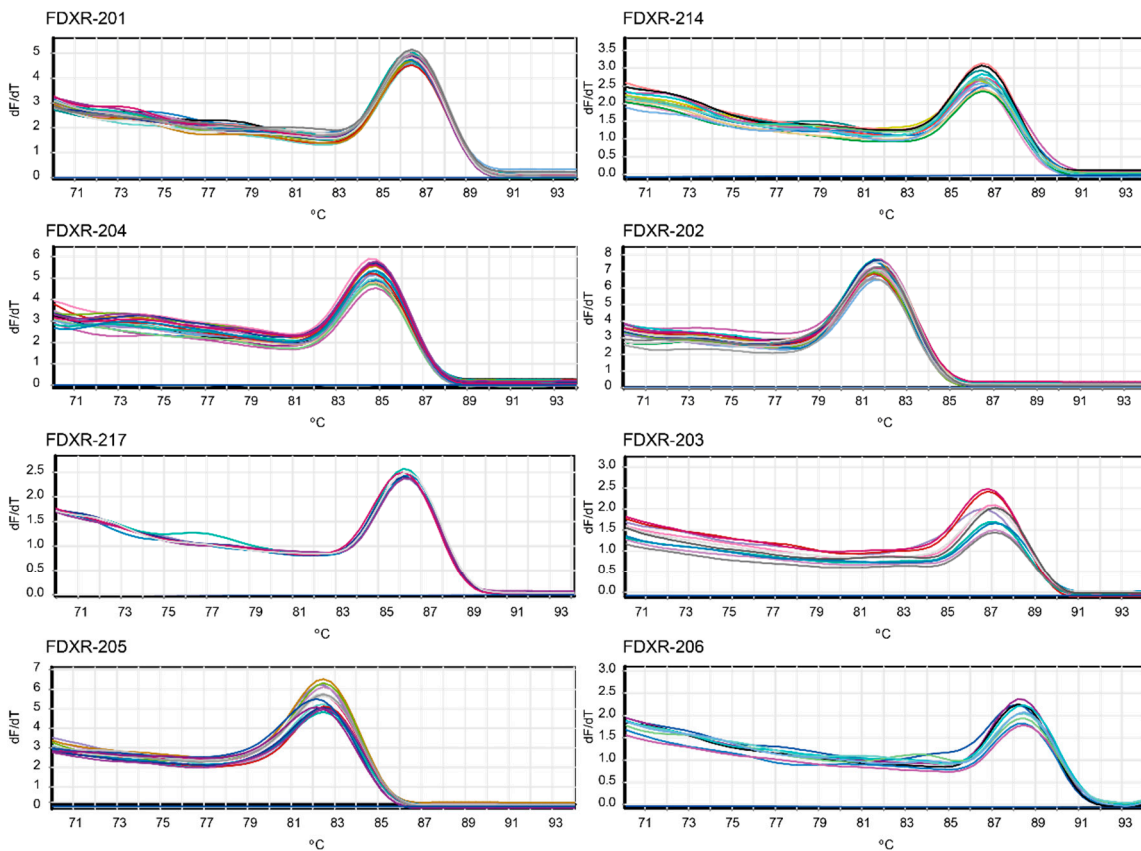

**Figure S2.** Melting curve analysis with SYBR Green-based qPCR analysis of 8 FDXR variants specific fragments amplified with specific primers (Table S2).

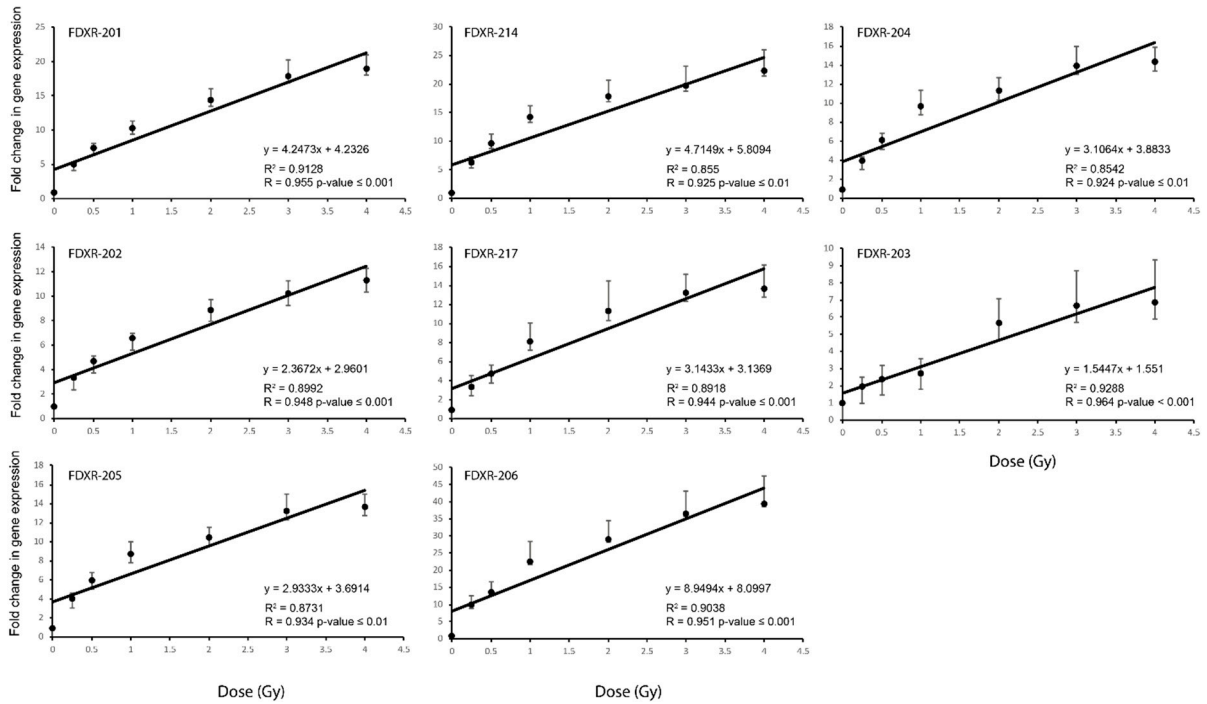

**Figure S3.** Linear regression analysis of the dose response curve for the FDXR and 7 variants for 10 healthy donors (5 women and 5 men). The data are presented as mean values  $\pm$  standard error of the mean (SEM). Pearson's correlation coefficient and p-values are shown for each variant.

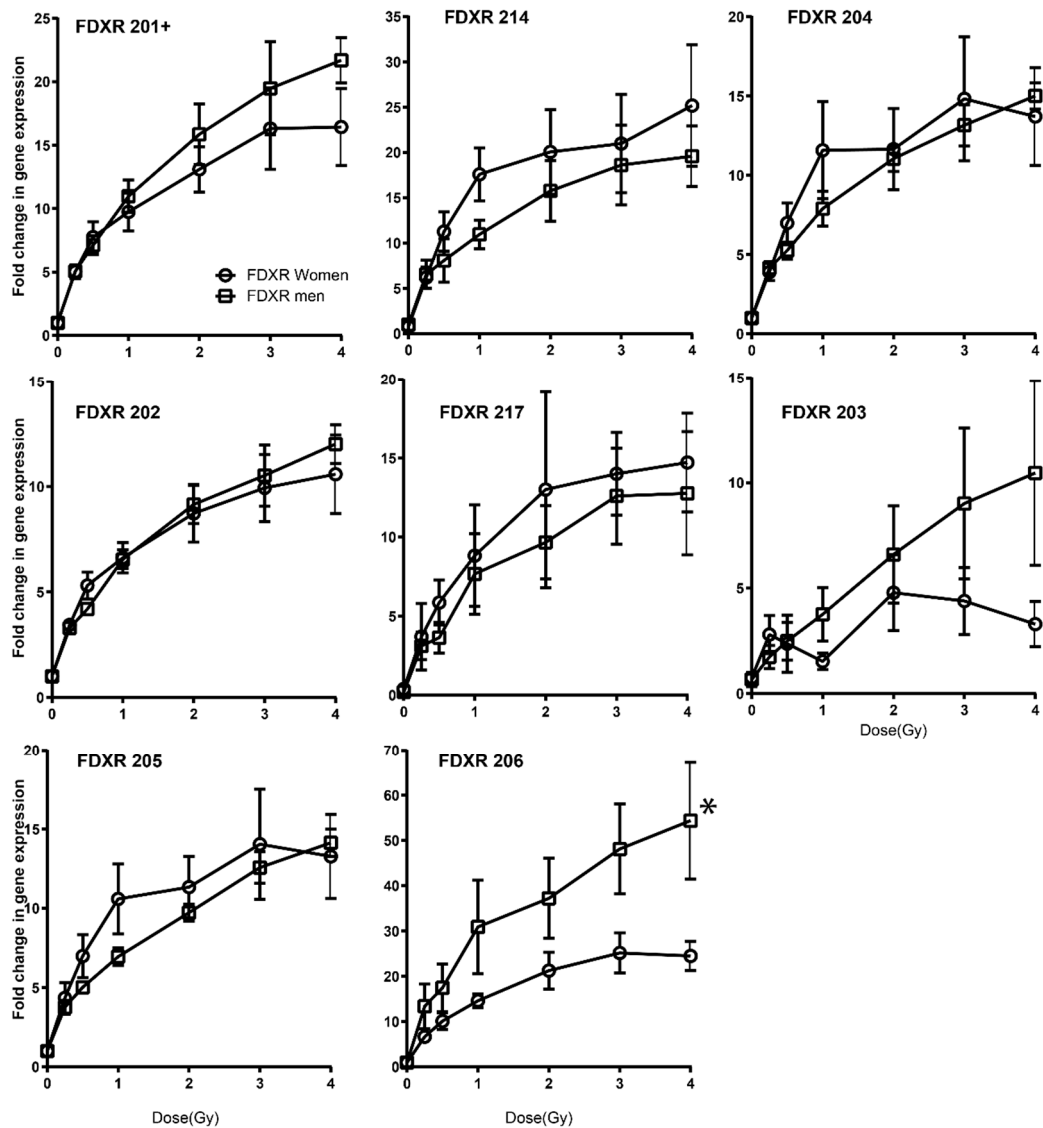

**Figure S4.** Gene expression of FDXR variants in human blood irradiated ex vivo in women and men. Blood from 5 women and 5 men was exposed to a range of x-ray doses (0.25, 0.5, 1, 2, 3, 4 Gy; dose rate 0.5 Gy/min) and incubated for 24h at 37°C. The data are presented as mean values  $\pm$  standard error of the mean (SEM). Statistical analyses were performed in log-transformed data. Significant differences (T-test,  $p \leq 0.05$ ) between women and men at each dose were indicated with an asterisk (\*).

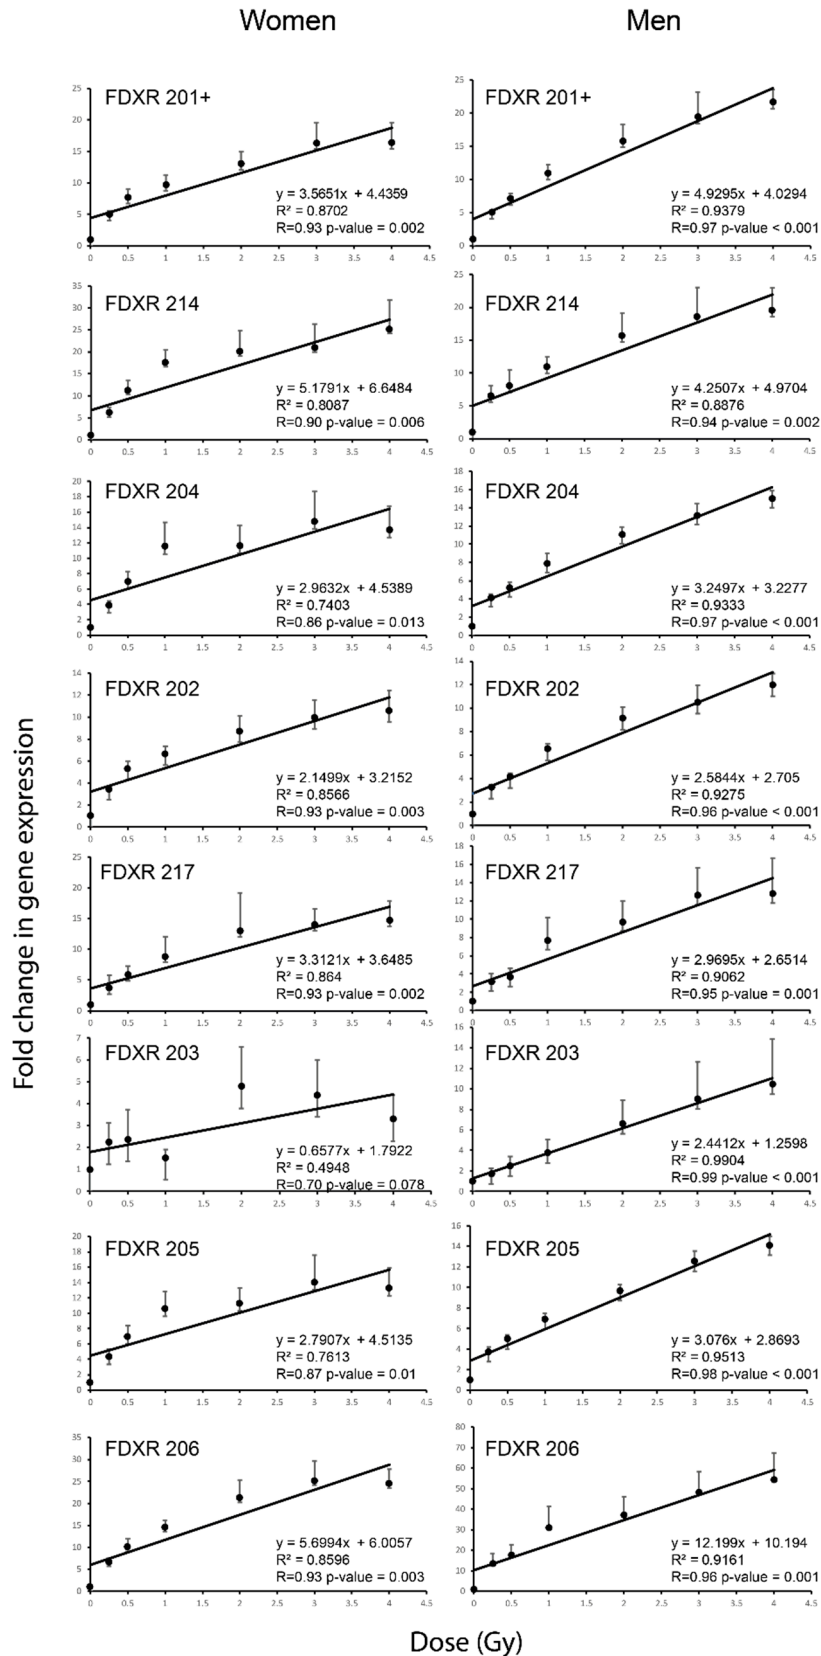

**Figure S5.** Linear regression analysis of the dose response curve for the FDXR and 7 variants for women (n=5) and men (n=5). The data are presented as mean values  $\pm$  standard error of the mean (SEM). Pearson's correlation coefficient and p-values are shown for each variant.

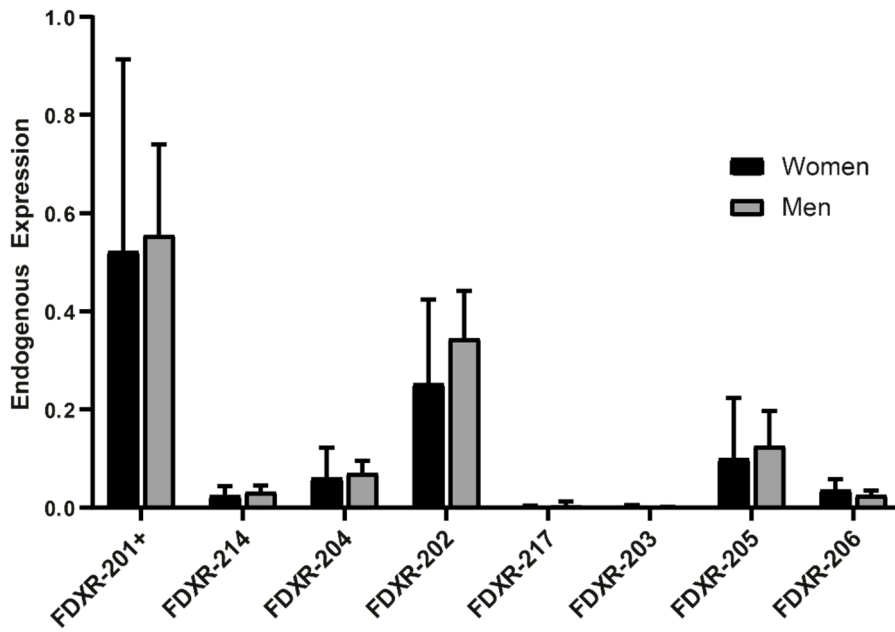

**Figure S6:** Comparison of basal level of expression of FDXR variants between genders. The basal level of expression of the FDXR variants was analysed in blood samples from 5 men and 5 women. The data are presented as mean values  $\pm$  SD. Statistical analyses were performed in log-transformed data (T-test,  $p \leq 0.05$ ). No differences were identified between genders.

**Table 1.** FDXR variants nomenclature, reference/transcripts ID, curation information, biotype and sequence and protein size.

| Name<br>Ensembl | GeneBank                | NCBI Reference<br>Sequence | Transcript ID          | CCDS          | Curated<br>sequences | Biotype                    | bp       | Protein       |
|-----------------|-------------------------|----------------------------|------------------------|---------------|----------------------|----------------------------|----------|---------------|
| FDXR-201        | Transcript<br>variant 1 | NM_024417.4                | ENST0000029319<br>5.10 | CCDS585<br>93 | ✓                    | Protein coding             | 184<br>6 | 491aa         |
| FDXR-214        | Transcript<br>variant 2 | NM_004110.6                | ENST0000058153<br>0.5  | CCDS117<br>07 | ✓                    | Protein coding             | 182<br>7 | 497aa         |
| FDXR-204        | Transcript<br>variant 3 | NM_001258012.1             | ENST0000044210<br>2.6  | CCDS585<br>95 | ✓                    | Protein coding             | 196<br>7 | 534aa         |
| FDXR-202        | Transcript<br>variant 4 | NM_001258013.3             | ENST0000041394<br>7.6  | CCDS585<br>96 | ✓                    | Protein coding             | 180<br>9 | 522aa         |
| FDXR-217        | Transcript<br>variant 5 | NM_001258014.3             | ENST0000058294<br>4.5  | CCDS585<br>92 | ✓                    | Protein coding             | 176<br>6 | 483aa         |
| FDXR-203        | Transcript<br>variant 6 | NM_001258015.2             | ENST0000042058<br>0.6  | CCDS585<br>94 | ✓                    | Protein coding             | 170<br>5 | 451aa         |
| FDXR-205        | Transcript<br>variant 7 | NM_001258016.3             | ENST0000054485<br>4.5  | CCDS585<br>91 | ✓                    | Protein coding             | 182<br>7 | 439aa         |
| FDXR-206        | Transcript<br>variant 8 | NR_047576.3                | ENST0000057750<br>9.5  |               | ✓                    | Nonsense mediated<br>decay | 191<br>2 | 46aa          |
| FDXR-207        |                         |                            | ENST0000057793<br>2.1  |               |                      | Retained intron            | 572      | No<br>protein |
| FDXR-208        |                         |                            | ENST0000057847<br>3.5  |               |                      | Retained intron            | 248<br>2 | No<br>protein |
| FDXR-209        |                         |                            | ENST0000057948<br>2.5  |               |                      | Nonsense mediated<br>decay | 215<br>7 | 46aa          |
| FDXR-210        |                         |                            | ENST0000057954<br>3.1  |               |                      | Nonsense mediated<br>decay | 558      | 46aa          |
| FDXR-211        |                         |                            | ENST0000057989<br>3.1  |               |                      | Protein coding             | 558      | 164aa         |
| FDXR-212        |                         |                            | ENST0000058049<br>2.5  |               |                      | Nonsense mediated<br>decay | 553      | 91aa          |
| FDXR-213        |                         |                            | ENST0000058121<br>9.1  |               |                      | Protein coding             | 567      | 178aa         |

|                 |                       |                            |          |               |
|-----------------|-----------------------|----------------------------|----------|---------------|
| <b>FDXR-215</b> | ENST0000058196<br>9.5 | lncRNA                     | 568      | No<br>protein |
| <b>FDXR-216</b> | ENST0000058271<br>0.5 | Nonsense mediated<br>decay | 846      | 46aa          |
| <b>FDXR-218</b> | ENST0000058388<br>1.5 | Nonsense mediated<br>decay | 156<br>1 | 76aa          |
| <b>FDXR-219</b> | ENST0000058391<br>7.5 | Protein coding             | 176<br>2 | 463aa         |
| <b>FDXR-220</b> | ENST0000061094<br>6.1 | lncRNA                     | 529      | No<br>protein |

**Table 2.** Primers designs for qPCR analysis.

| <b>Transcript Variants for<br/>FDXR</b> | <b>Accession number<br/>NCBI</b> | <b>F Primer</b>                      | <b>R primer</b>                      | <b>Size<br/>(bp)</b> | <b>Cross-reaction with<br/>other FDXR variants</b>                                   |
|-----------------------------------------|----------------------------------|--------------------------------------|--------------------------------------|----------------------|--------------------------------------------------------------------------------------|
| <b>FDXR-201</b>                         | NM_024417.4                      | 5'-<br>GTACAACGGGCTTCCTGAG<br>A-3'   | 5'-<br>CTCAGGTGGGGTCAGTAGG<br>A-3'   | 121                  | FDXR-<br>201,214,204,202,217,203,<br>205,206,<br>208,209,211,214,216,217,<br>218,219 |
| <b>FDXR-214</b>                         | NM_004110.5                      | 5'-<br>CTGAGAACCAGGAGCTGGA<br>G-3'   | 5'-<br>GTCCGTTCTCTGGCACAAA-<br>3'    | 143                  |                                                                                      |
| <b>FDXR-204</b>                         | NM_001258012.3                   | 5'-<br>GGTGGAAGCCTTGTGTTCT-3'        | 5'-<br>GAGAGAGAGAGGCTGGGA-<br>3'     | 94                   | FDXR-213                                                                             |
| <b>FDXR-202</b>                         | NM_001258013.3                   | 5'-<br>TGAAGTAAGAGACCCTGCA<br>AAT-3' | 5'-<br>ATATCCAACAGAAGCTGGA<br>ACT-3' | 99                   |                                                                                      |
| <b>FDXR-217</b>                         | NM_001258014.3                   | 5'-<br>CTTCTACACGGCCCAACAC-<br>3'    | 5'-AATGGGCCGCTTCACCT-<br>3'          | 131                  | FDXR-213/FDXR-218                                                                    |

|                 |                |                                    |                                        |     |                  |
|-----------------|----------------|------------------------------------|----------------------------------------|-----|------------------|
| <b>FDXR-203</b> | NM_001258015.2 | 5'-<br>GCCACCATTCTCCACACAG<br>-3'  | 5'-<br>CCCCGTAGCTCTTCACCTC-3'          | 198 |                  |
| <b>FDXR-205</b> | NM_001258016.3 | 5'-<br>AGGTCAGCCACGAGAGATA<br>A-3' | 5'-<br>GCTCTCTGTCCTTATCTTCCA<br>TTC-3' | 132 |                  |
| <b>FDXR-206</b> | NR_047576.2    | 5'-<br>CACCCCGAGTAGGAGCAG-3'       | 5'-<br>GGAGAAATGGTGGCAGAAG<br>C-3'     | 125 | FDXR-208/FDXR209 |

**Table 3.** Tukey pairwise comparisons for Figure 1A. Grouping information for each radiation dose using the Tukey method and 95% confidence are presented in the table. On the left column all the variants are listed and in the top horizontal row the different irradiation doses groups are presented as in Figure 1A.

|             | 0.25 Gy | 0.5 Gy | 1 Gy | 2 Gy | 3 Gy | 4 Gy |
|-------------|---------|--------|------|------|------|------|
| <b>201+</b> | b       | b      | bc   | bc   | b    | bc   |
| <b>214</b>  | ab      | ab     | ab   | ab   | b    | b    |
| <b>204</b>  | b       | b      | bc   | bc   | b    | bc   |
| <b>202</b>  | b       | b      | bc   | bc   | b    | bc   |
| <b>217</b>  | b       | b      | bc   | bc   | b    | bc   |
| <b>203</b>  | b       | b      | c    | c    | b    | c    |
| <b>205</b>  | b       | b      | bc   | bc   | b    | bc   |
| <b>206</b>  | a       | a      | ab   | ab   | a    | a    |

**Table 4.** Tukey pairwise comparisons for Figure 2A (A) and Figure 2B (B). Grouping information for each radiation dose using the Tukey method and 95% confidence are presented in the table. On the left column all the variants are listed and in the top horizontal row the different irradiation doses groups are presented as in Figure 1A.

| A           | 0.25 Gy | 0.5 Gy | 1 Gy | 2 Gy | 3 Gy | 4 Gy |
|-------------|---------|--------|------|------|------|------|
| <b>201+</b> | a       | ab     | abc  | ab   | abc  | ab   |
| <b>214</b>  | a       | a      | a    | a    | ab   | a    |
| <b>204</b>  | a       | ab     | abc  | ab   | abc  | ab   |
| <b>202</b>  | a       | ab     | bc   | ab   | bc   | ab   |
| <b>217</b>  | a       | ab     | abc  | ab   | bc   | ab   |
| <b>203</b>  | a       | b      | c    | b    | c    | b    |
| <b>205</b>  | a       | ab     | abc  | ab   | bc   | ab   |
| <b>206</b>  | a       | a      | ab   | a    | a    | a    |



| B    | 0.25 Gy | 0.5 Gy | 1 Gy | 2 Gy | 3 Gy | 4 Gy |
|------|---------|--------|------|------|------|------|
| 201+ | b       | b      | b    | b    | b    | b    |
| 214  | ab      | ab     | b    | b    | b    | b    |
| 204  | b       | b      | b    | b    | b    | b    |
| 202  | b       | b      | b    | b    | b    | b    |
| 217  | b       | b      | b    | b    | b    | b    |
| 203  | b       | b      | b    | b    | b    | b    |
| 205  | b       | b      | b    | b    | b    | b    |
| 206  | a       | a      | a    | a    | a    | a    |

**Table 5.** Average fold of change (FC), standard deviation (SD) and coefficient of variation (CV) of FDXR variants expression in response to radiation exposure in in vivo samples from total body irradiated patients (TBI). Total body irradiated patient's samples were collected 16 h after the first fraction and 8 h after the second (n=4). Gene expression profile of FDXR variants is presented in Figure 3.

|          | TBI cancer patients |      |       |
|----------|---------------------|------|-------|
|          | Average FC          | SD   | CV    |
| FDXR-201 | 5.8                 | 3.5  | 100.6 |
| FDXR-214 | 5.4                 | 2.4  | 100.4 |
| FDXR-204 | 10.1                | 12.0 | 101.2 |
| FDXR-202 | 7.3                 | 7.1  | 101.0 |
| FDXR-217 | 5.9                 | 4.9  | 100.8 |
| FDXR-203 | 2.0                 | 0.4  | 100.2 |
| FDXR-205 | 7.8                 | 8.5  | 101.1 |
| FDXR-206 | 6.3                 | 4.0  | 100.6 |

**Table 6.** Average fold of change (FC), standard deviation (SD) and coefficient of variation (CV) of FDXR variants expression in response to radiation exposure in in vivo samples from endometrial cancer patients treated with radiotherapy. Blood samples were collected 24 h after the first fraction (n=8). Gene expression profile of FDXR variants is presented in Figure 4.

|          | Endometrial cancer patients |     |      |
|----------|-----------------------------|-----|------|
|          | Average FC                  | SD  | CV   |
| FDXR-201 | 3.1                         | 0.6 | 20.3 |
| FDXR-214 | 2.4                         | 1.1 | 46.3 |

|                 |     |     |      |
|-----------------|-----|-----|------|
| <b>FDXR-204</b> | 2.9 | 0.8 | 28.1 |
| <b>FDXR-202</b> | 2.6 | 0.7 | 25.6 |
| <b>FDXR-217</b> | 2.6 | 1.2 | 46.3 |
| <b>FDXR-203</b> | 2.6 | 1.4 | 52.3 |
| <b>FDXR-205</b> | 2.6 | 0.5 | 19.6 |
| <b>FDXR-206</b> | 3.1 | 1.1 | 35.6 |

**Table 7.** FDXR variants identified by nanopore sequencing. Counts are normalized by HPRT1 and the coefficient of variation (CV) for their consistency between replicates has been calculated in the control and irradiated samples.

|                 | <b>C1</b> | <b>C2</b> | <b>C3</b> | <b>Average</b> | <b>SD</b> | <b>CV</b> | <b>IR1</b> | <b>IR2</b> | <b>IR3</b> | <b>Average</b> | <b>SD</b> | <b>CV</b> |
|-----------------|-----------|-----------|-----------|----------------|-----------|-----------|------------|------------|------------|----------------|-----------|-----------|
| <b>FDXR-201</b> | 0.03027   | 0.048509  | 0.032526  | 0.0371         | 0.0099    | 26.80     | 0.822521   | 0.715406   | 0.596453   | 0.7115         | 0.1131    | 15.89     |
| <b>FDXR-214</b> | 0         | 0         | 0         | 0.0000         | 0.0000    | /         | 0.008203   | 0          | 0          | 0.0027         | 0.0047    | 173.21    |
| <b>FDXR-204</b> | 0         | 0         | 0.011765  | 0.0039         | 0.0068    | 173.21    | 0.09918    | 0.127171   | 0.102076   | 0.1095         | 0.0154    | 14.06     |
| <b>FDXR-203</b> | 0         | 0         | 0         | 0.0000         | 0.0000    | /         | 0          | 0.003361   | 0.002163   | 0.0018         | 0.0017    | 92.51     |
| <b>FDXR-205</b> | 0         | 0.002021  | 0         | 0.0007         | 0.0012    | 173.21    | 0.008203   | 0.02577    | 0.004325   | 0.0128         | 0.0114    | 89.52     |
| <b>FDXR-206</b> | 0.001081  | 0         | 0.002076  | 0.0011         | 0.0010    | 98.67     | 0.01566    | 0.019048   | 0.028547   | 0.0211         | 0.0067    | 31.68     |
| <b>FDXR-207</b> | 0         | 0.001011  | 0         | 0.0003         | 0.0006    | 173.21    | 0.001491   | 0.005042   | 0.003028   | 0.0032         | 0.0018    | 55.88     |
| <b>FDXR-208</b> | 0.005946  | 0.012633  | 0.006228  | 0.0083         | 0.0038    | 45.74     | 0.134974   | 0.182073   | 0.202855   | 0.1733         | 0.0348    | 20.07     |
| <b>FDXR-209</b> | 0.000541  | 0.001011  | 0         | 0.0005         | 0.0005    | 97.79     | 0.014169   | 0.010644   | 0.013841   | 0.0129         | 0.0019    | 15.11     |
| <b>FDXR-213</b> | 0.003243  | 0.011622  | 0.004152  | 0.0063         | 0.0046    | 72.53     | 0.108874   | 0.103641   | 0.084343   | 0.0990         | 0.0129    | 13.06     |
| <b>FDXR-218</b> | 0         | 0         | 0         | 0.0000         | 0.0000    | /         | 0.006711   | 0.001681   | 0.00346    | 0.0040         | 0.0026    | 64.56     |
| <b>FDXR-219</b> | 0         | 0         | 0         | 0.0000         | 0.0000    | /         | 0.001491   | 0.006723   | 0.002595   | 0.0036         | 0.0028    | 76.54     |
